# Supplementary material
Source: HighWire-hosted journal article supplement (https://qdcxjkg.com/highwire/filestream/112912/field_highwire_adjunct_files/0/ERJ_10_1696.pdf)
Supplement: ERJ_10_1696.pdf [file ERJ_10_1696.pdf]

## CORRIGENDUM

"An evaluation of salmeterol in the treatment of chronic obstructive pulmonary disease (COPD). G. Boyd, A.H. Morice, J.C. Pounsford, M. Siebert, N. Peslis, C. Crawford, on behalf of an international study group. *Eur Respir J* 1997; 10: 815–821.

An error was made in the printing of the definition of the bars in the legend to figure 2. The correct figure and legend is reproduced below:

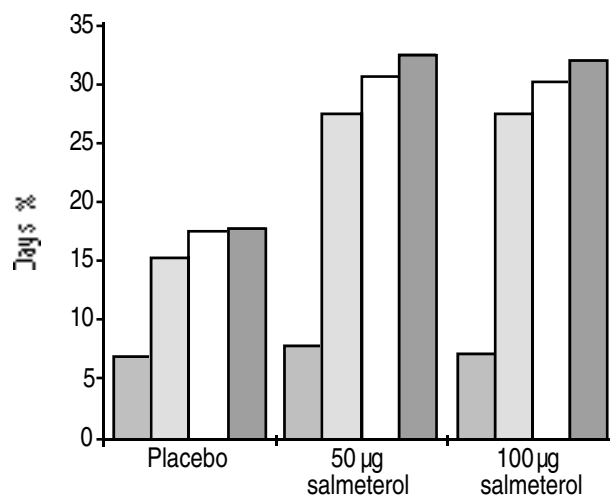

Fig. 2. – Mean percentage of days with no additional daytime bronchodilator medication. ■: baseline; ■: Weeks 1–4; □: Weeks 5–8; ■: Weeks 9–16.
